# Supplementary material for: MicroRNA-221 is a potential biomarker of myocardial hypertrophy and fibrosis in hypertrophic obstructive cardiomyopathy
Source: PubMed Central journal article supplement (PMC6954366; doi:10.1042/bsr20191234), 2020-01-10
Supplement: BSR-2019-1234_supp.pdf [file BSR-2019-1234_supp.pdf]

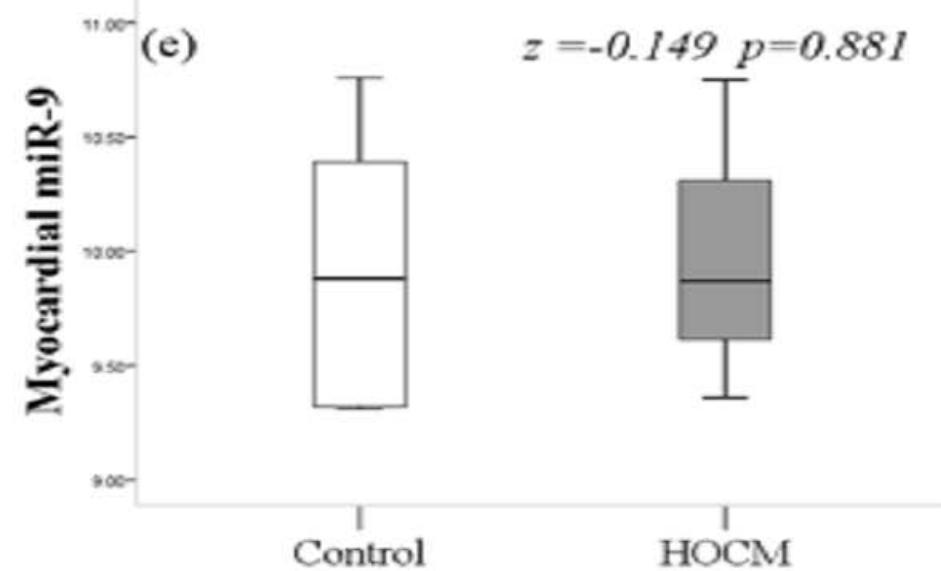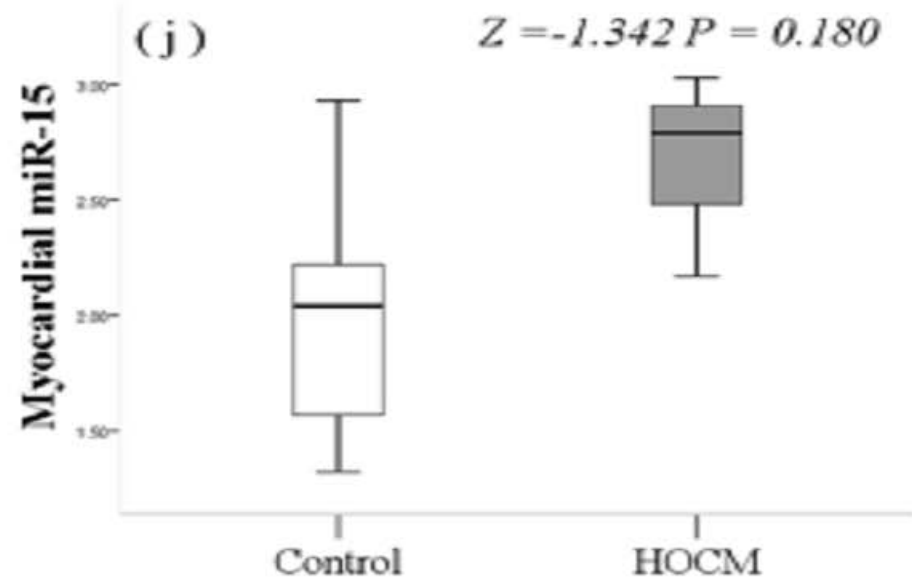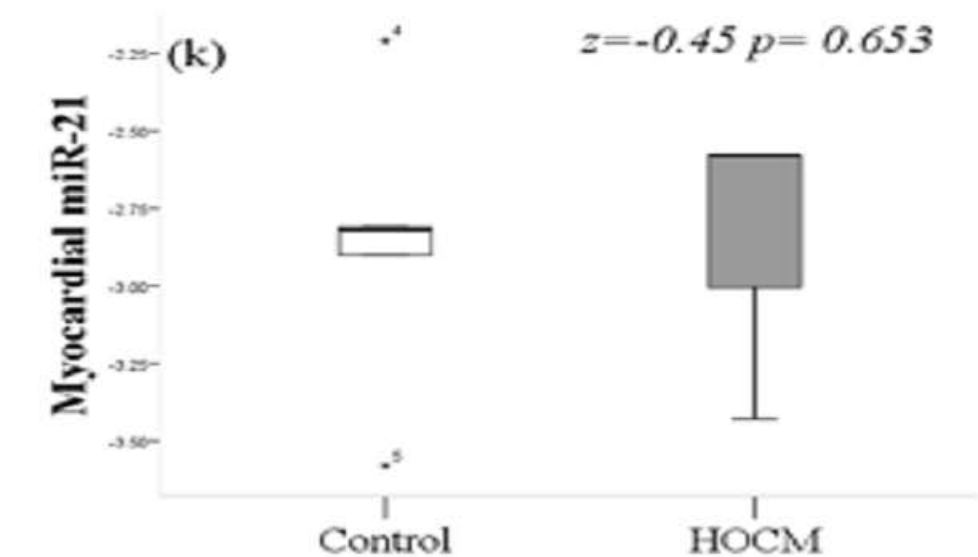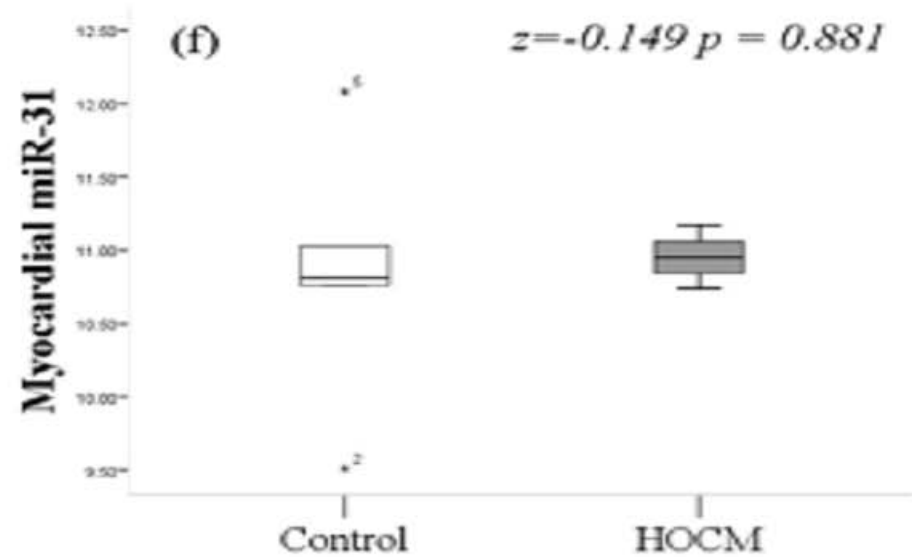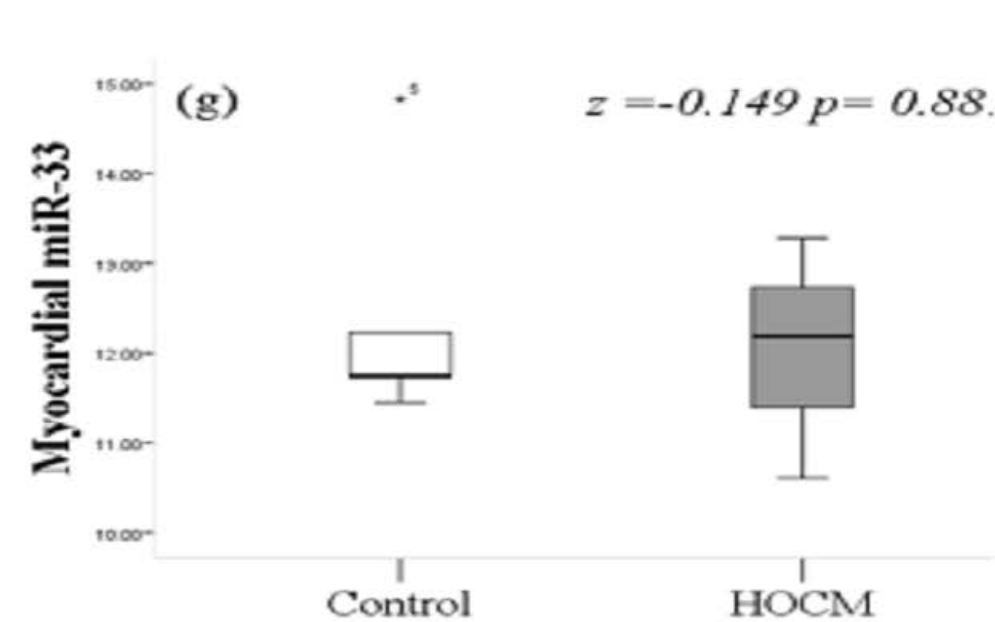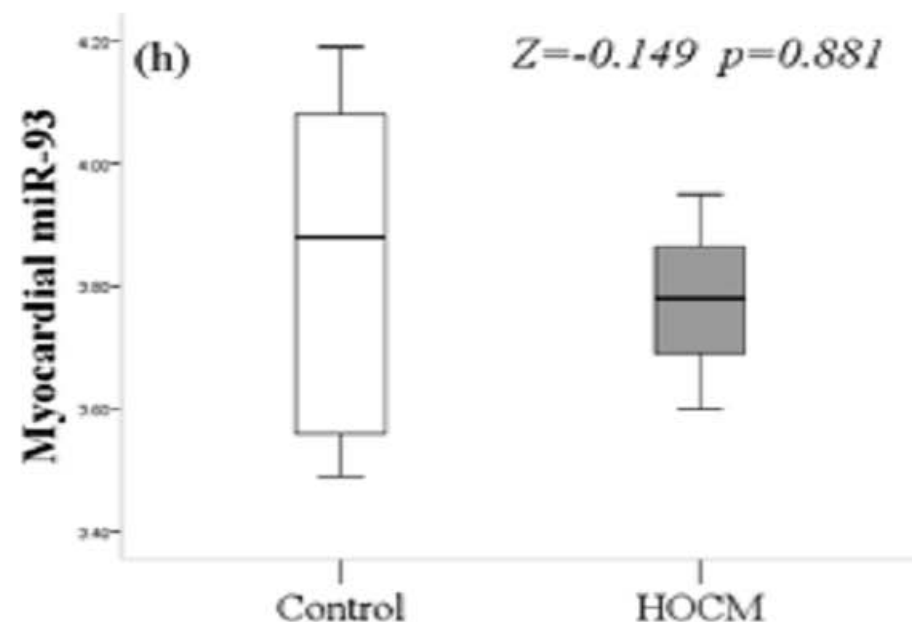

**FigureS1. Six myocardial miRNA expressions in HOCM group were no significantly differences compared with the control group.** Namely, miR-9 (e), miR-31(f), miR-33(g), miR-93(h), miR-15 (j) and iR-21 (k). HOCM, hypertrophic obstructive cardiomyopathy

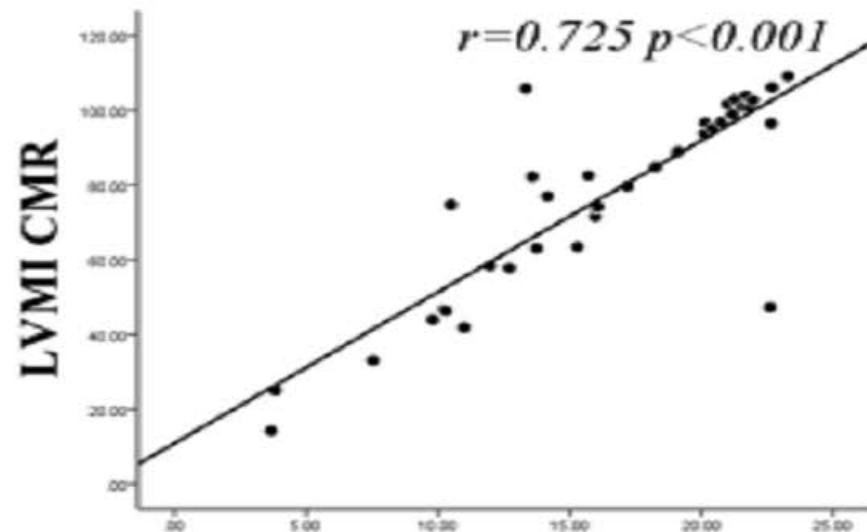

(g) Circulating miR-221

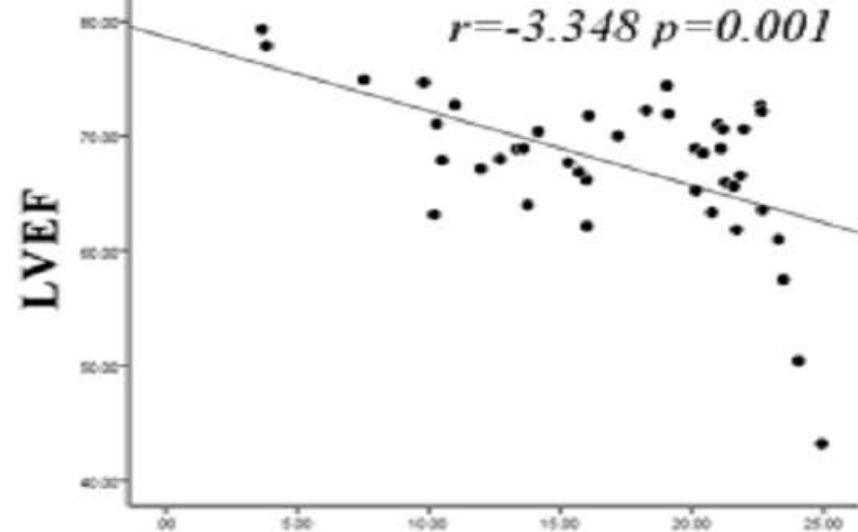

(h) Circulating miR-221

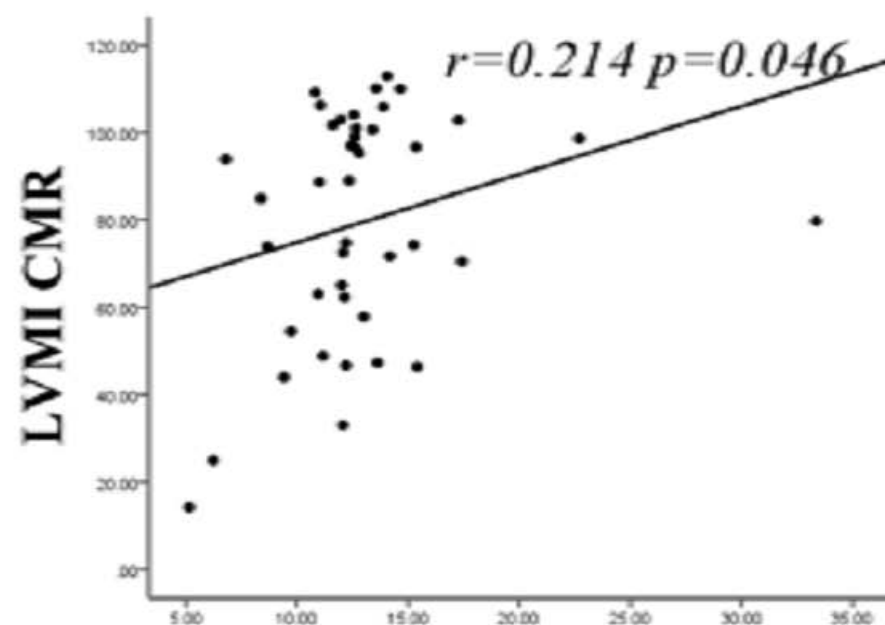

(i) Circulating miR-19b

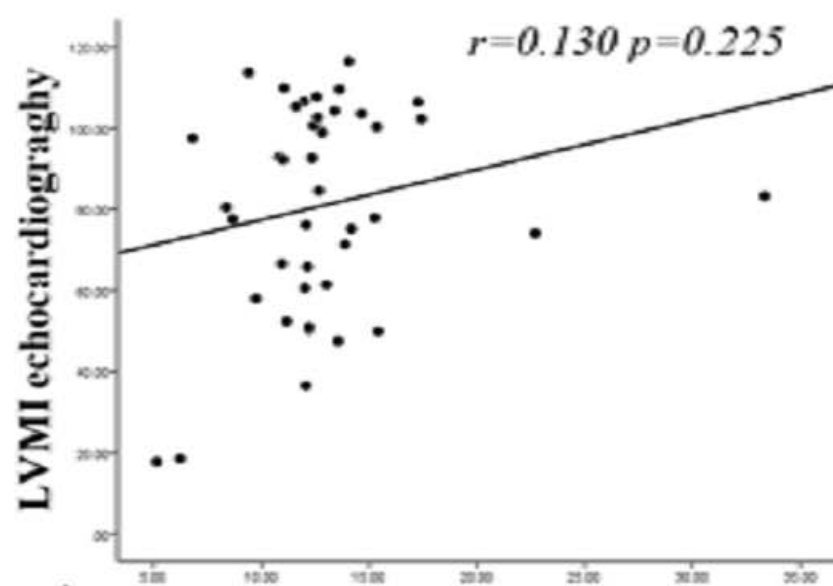

(j) Circulating miR-19b

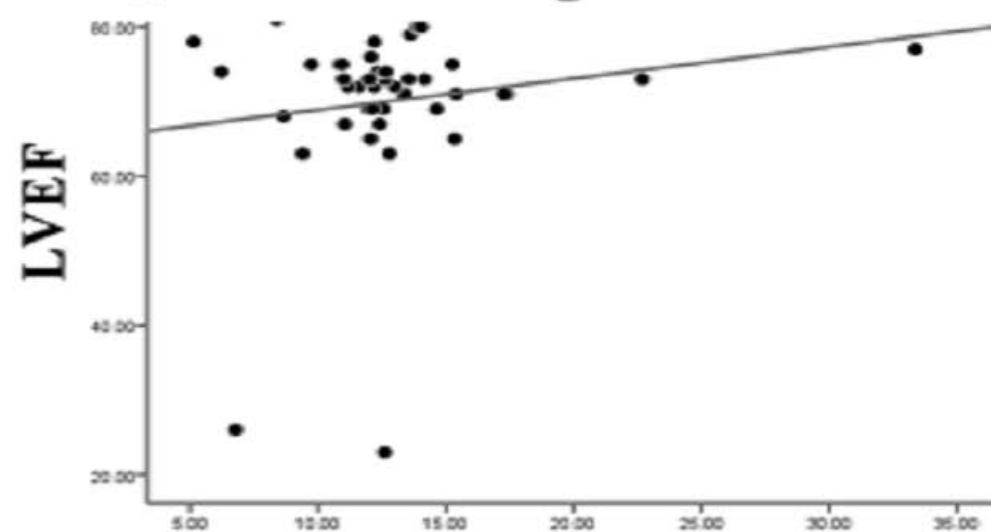

(k) circulating miR-19b

**FigureS2. Correlation between circulating miRNA expression and myocardial remodelling parameters.** MiR-221 expression positively correlated with LVMI in CMR (g), negatively correlated with LVEF (h). No correlation between miR-19b and LVMI inCMR (i), LVMI in echocardiography (j) and LVEF (k). CMR means cardiac magnetic resonance, LVMI, left ventricular mass index, LVEF means left ventricular ejection fraction.

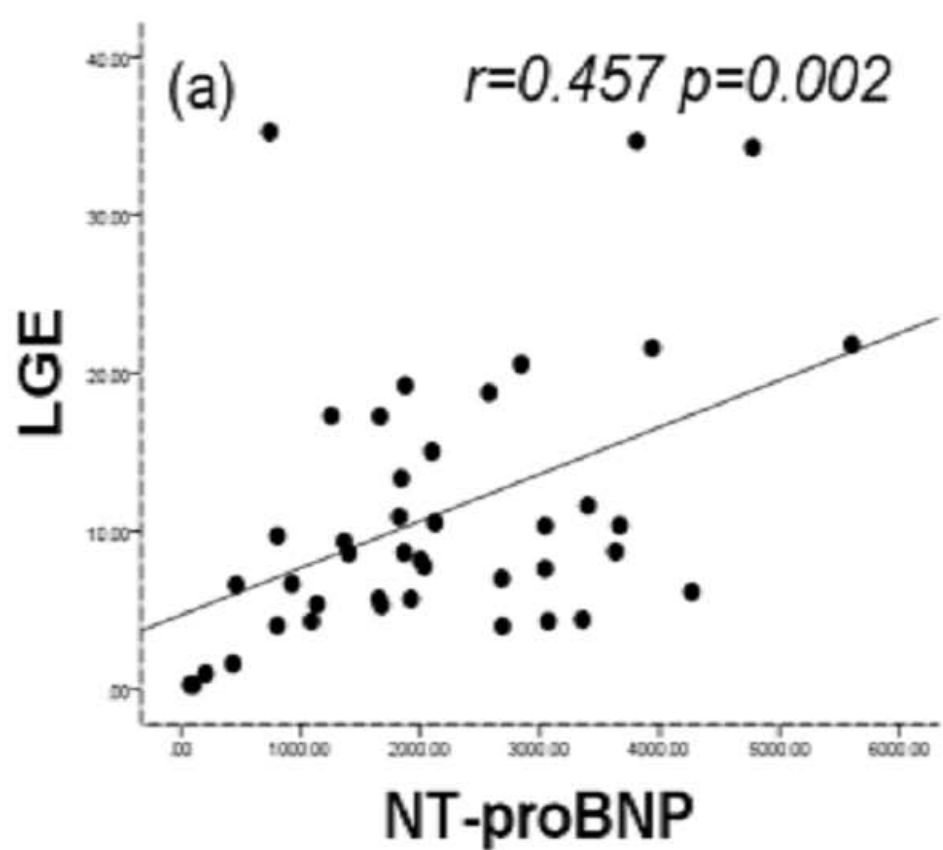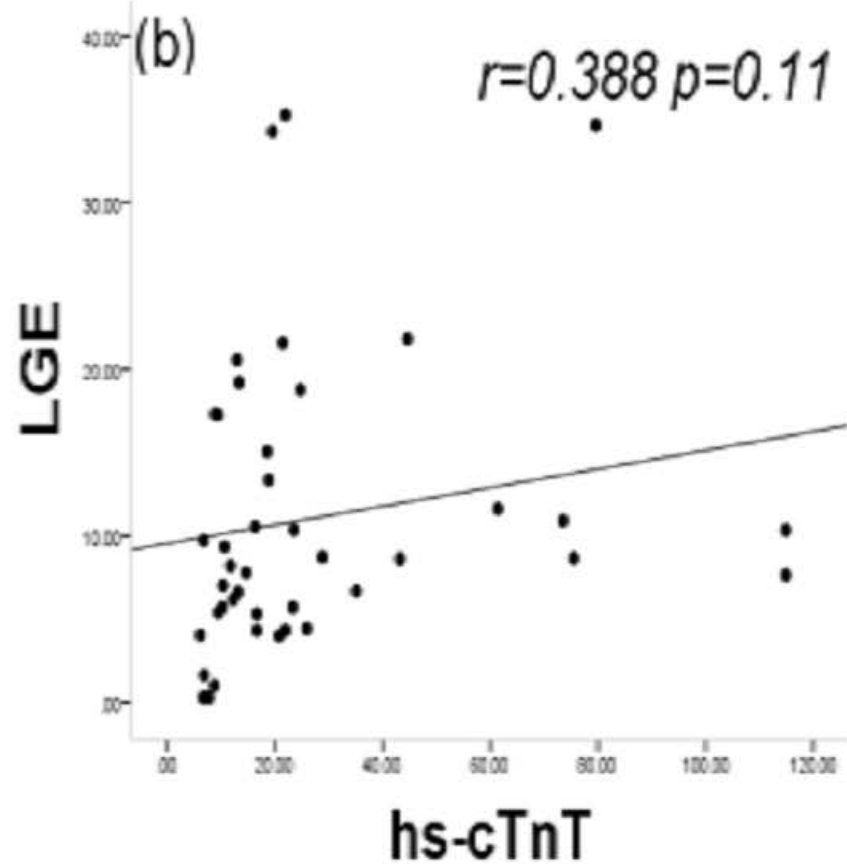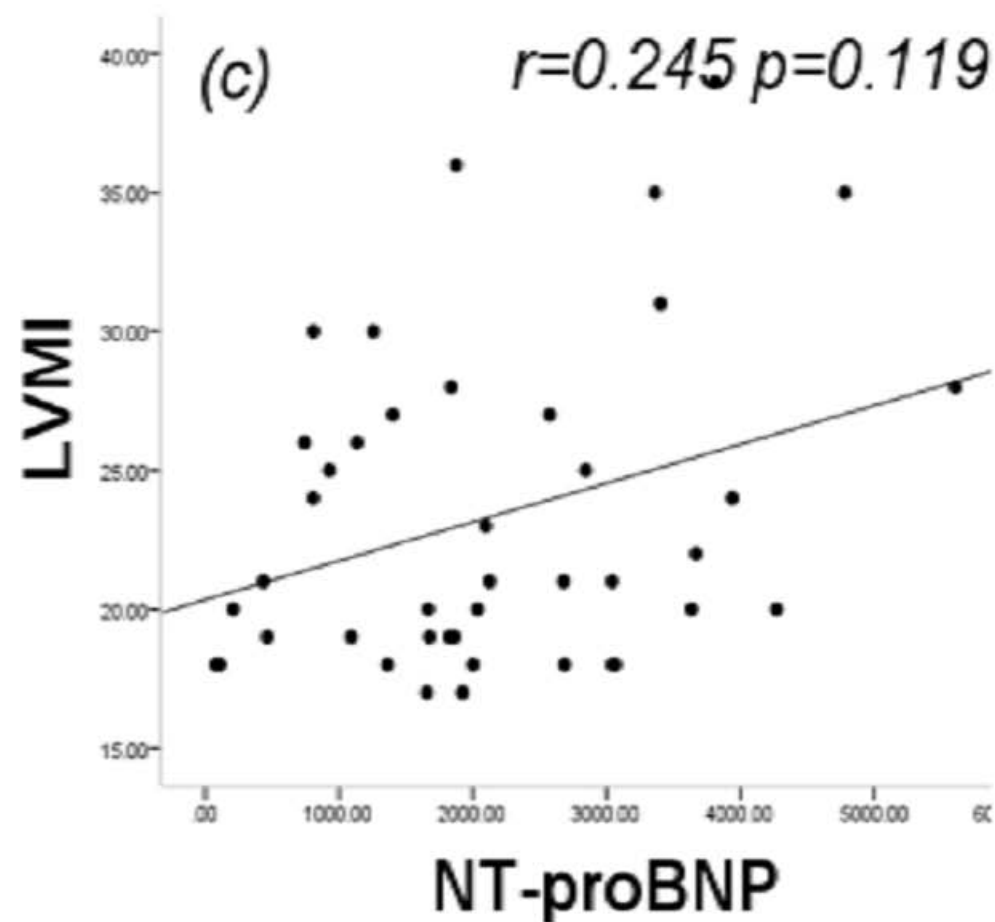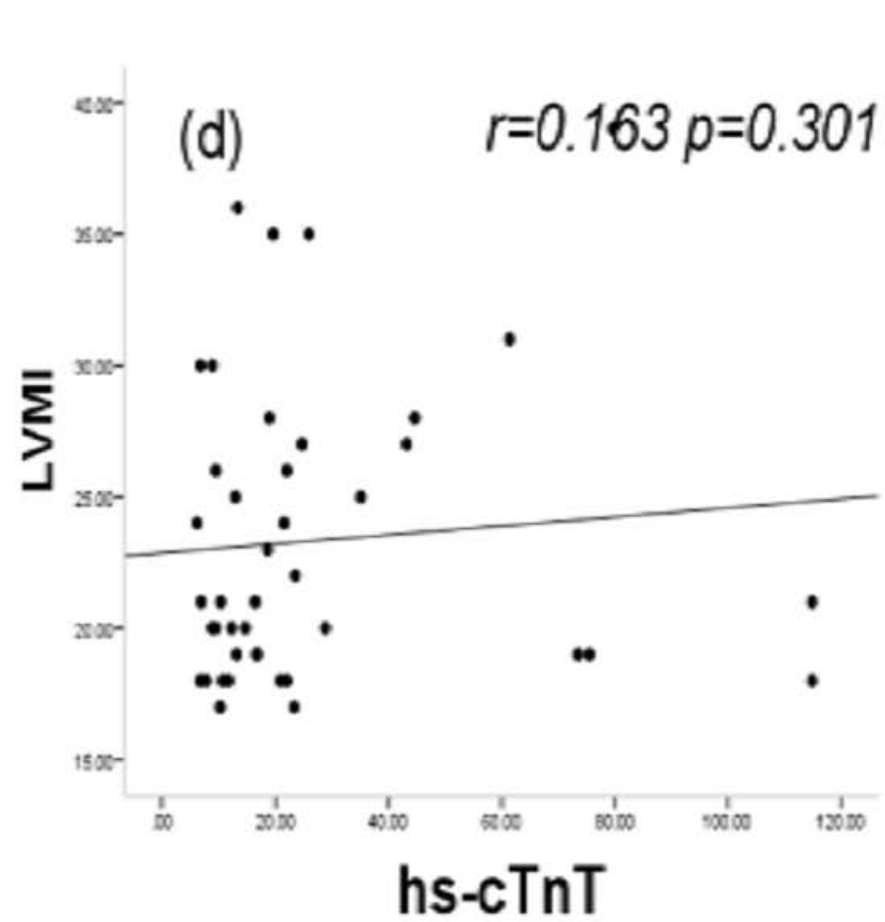

**FigureS3. Correlation between NT-proBNP or hs-cTnT and myocardial remodelling.**(a)

Positive correlation between NT-proBNP and LGE ( $r=0.457$   $p=0.002$ ). (b) Positive correlation between hs-cTnT and LGE ( $r=0.388$   $p=0.011$ ). (c) There was no significant correlation between NT-proBNP and LVMI ( $r=0.245$   $p=0.119$ ). (d) There was no correlation between hs-cTnT and LVMI ( $r=0.163$   $p=0.301$ ). LVMI, left ventricular mass index; LGE, late gadolinium enhancement; hs-cTnT, High-sensitivity cardiac troponin T; NT-proBNP, N-terminal pro-brain natriuretic peptide.
